# Supplementary material for: Hydrogel formation by liquid–solid phase transition of hagfish intermediate filament protein condensates
Source: Royal Society of Chemistry journal article supplement (doi:10.1039/d5sm00939a), 2025-01-01
Supplement: d5sm00939a1.pdf [file d5sm00939a1.pdf]

**Supporting Information for**

# Hydrogel Formation by Liquid–Solid Phase Transition of Hagfish Intermediate Filament Protein Condensates

*Ryuki Kobayashi<sup>1</sup>, Syunsuke Kondo<sup>2</sup>, Koh Yoshida<sup>2</sup>, Yasunori Watanabe<sup>3</sup>, Jin Gong<sup>2</sup>  
and Hideki Nabika<sup>3\*</sup>*

<sup>1</sup> Department of Science, Graduate School of Science and Engineering, Yamagata University, 1-4-12, Kojirakawa, Yamagata 990-8560, Japan

<sup>2</sup> Department of Organic Materials Science, Graduate School of Organic Materials Science, Yamagata University, Yonezawa, Yamagata 992-8510, Japan

<sup>3</sup> Faculty of Science, Yamagata University, 1-4-12 Kojirakawa, Yamagata 990-8560, Japan

**Corresponding Author**

\*Hideki Nabika, Faculty of Science, Yamagata University 1-4-12, Kojirakawa, Yamagata 990-8560, Japan. Tel: +81-23-628-4589. Email: [nabika@sci.kj.yamagata-u.ac.jp](mailto:nabika@sci.kj.yamagata-u.ac.jp)

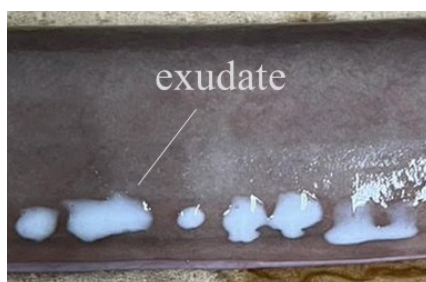

**Figure S1. Image of hagfish exudate.** Exudate released along the abdomen of hagfish following its sedation and subsequent mild electrical stimulation.

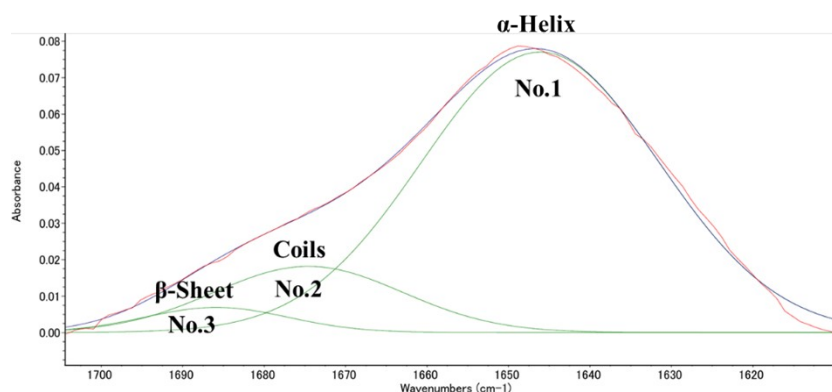

**Figure S2. Peak resolution for the amide I band of purified hagfish IF protein samples.** The secondary structure was identified from the amide I band of the IF protein spectrum recovered after the purification process in Figure 1A. The secondary structure was identified from the amide I band of the IF protein spectrum recovered after the purification process in Figure 1A, where the presence of a high-wavenumber shoulder around 1690  $\text{cm}^{-1}$  indicates the formation of antiparallel  $\beta$ -sheet structures.

**Table S1.** Parameter values for the amide I component peaks of the wave spectra of purified and treated IF proteins (Figure 1A purple line).

| No. of peaks | Center ( $\text{cm}^{-1}$ ) | Height | Width | Area  | % Area |
|--------------|-----------------------------|--------|-------|-------|--------|
| 1            | 1646                        | 0.0770 | 34.4  | 2.818 | 80.6   |
| 2            | 1674                        | 0.0181 | 27.3  | 0.527 | 15.1   |
| 3            | 1685                        | 0.0069 | 20.7  | 0.151 | 4.3    |

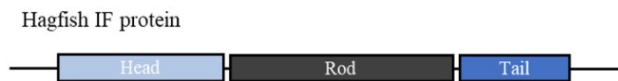

TK $\alpha$  :

MSISQTVSKSYTKSVSRGGQGVSYSQSSSHKVGGGSVRYGTTYSSGGISRVLGFQGGAGGAASA  
GFGGSVGGSGLSRVLGGSMVSGYRSGMGVGGLSLSGTAGLPVSLRGVGAGKALHAITSAFRTR  
VGGPGTSVGGYGVNYSFLPSTAGPSFGGPFGGPFGGPLGPGYIDPATLPSPDTVQHTRIREK  
QDLQTLNKFANLVDQVRTLEQHNAILKAQISMITSPSDTPEGPVNTAVVASTVTATYNAQIEDL  
RTTNTALHSEIDHLTTIINDITTKYEEQVEVTRTLETDWNTNKNIDNTYLTIVDLQTKVQGLDEQ  
INTTKQIYNARVREVQAAVTGGPTAAYSIRVDNTHQAIDLTTSLQEMKTHYEVLATKSREEAFT  
QVQPRIQEMAVTVQAGPQAIQAKEQIHVFKLQIDSVHREIDRLHRKNTDVEREITVIETNIHTQS  
DEWTNNINSLKVDLEVIKKQITQYARDYQDLLATKMSLDVEIAAYKKLLDSEETRISHGGGITIT  
TNAGTFPGGLSAAPGGGASYAMVPAGVGGVGLAGVGGYGFRSMGGGGGGVGYGAGGGGGVGY  
GVGGGFGGGMGMSMSRMSMGAAVGGGSYGSGSGYSGGFGLSRSSRAGYSASRKSYSARSSSRI  
Y

TK $\gamma$  :

MASHSSVSYSRVRTGGTSAMIGSSGYGGSSSSRAMGLGMGAAGLSMGGGSFRVGSAGIGGMG  
ISSGIGGMGISSRAGGMSAYGGAASGGAGGFVSGGVPM LGYGGGAGGFIGGVSPGIMASPAFT  
AGRAITSAGMSGVVGTLPAGGMVPSLVSRDEVKNILGTLNQRLASYVDKVRQLTIENETMEE  
ELKNLTGGVPMSPDSTVNLENVETQVTEMLTEVSNLTLEVRLEIDVDHLRATADEIKSKYEFE  
LGVRMQLETDIANMKRDLEAANDMRVDLDSKFNFLEELTFQRKTQMEELNTLKQQFGRLGP  
VQTSVIELDNVKSVNLTALNVMREEYQQVVTKNVQEAETYCKMQIDQIQGISTQTTEQISILD  
KEINTLEKELQPLNVEYQRLTTYQTLGDRLTDLQNRRESIDL VQFQNTYTRYEQEIEGNQVDLQ  
RQLVTYQQLLDVKTALDAEIATYKKLLEGQELMVRTAMADDFAHATVVRSGLTGGASSSVG  
YGASSTTLGAISGGYSTGGGASYAGAGGASYAGAGGASYGVGGGYSGGSSAMMEGSSSGG  
HSMYSSSSMKRSSKSASASAGGYGTSGHDSHILQQ

**Figure S3. Amino acid sequences of hagfish thread keratin  $\alpha$  and  $\gamma$  used to predict phase separation propensity.**

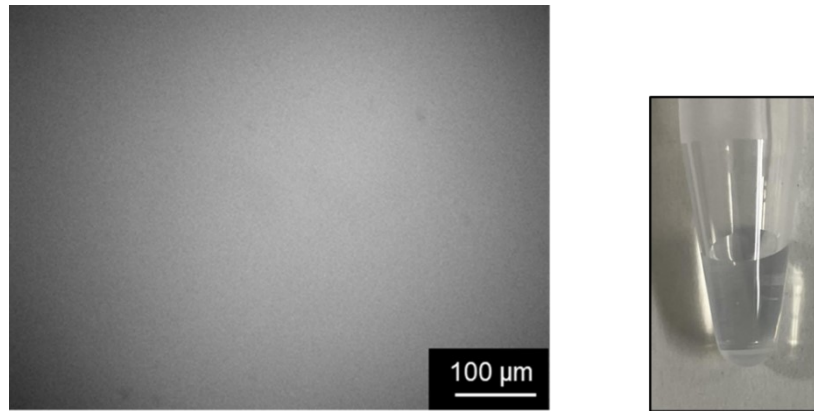

**Figure S4. Differential interference contrast microscopic image and photographs of the solution in a system lacking intermediate filament proteins.** DIC image (left) and photograph (right) of a solution containing 10% (w/v) DEX and 100 mM NaCl. In the absence of monomerized IF proteins, no phase separation dynamics occurred, and no precipitates formed in the system.

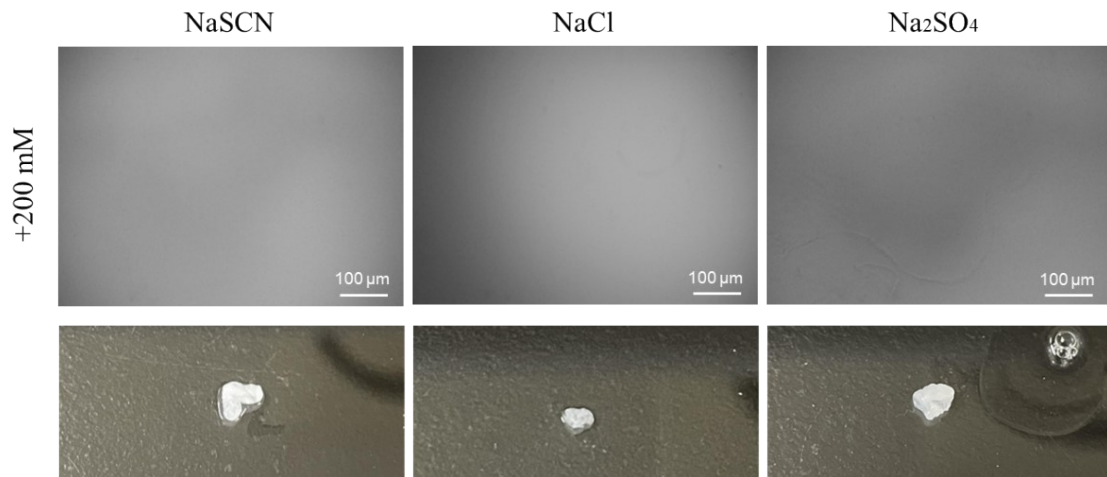

**Figure S5. Hofmeister effect on intermediate filament protein precipitate formation.** DIC images (top) and photographs (bottom) of precipitates formed by the addition of NaSCN (a chaotrope), NaCl, and Na<sub>2</sub>SO<sub>4</sub> (a kosmotrope) in a Hofmeister series aimed at verifying the salting out effect on IF proteins. The samples consisted of each electrolyte dissolved in PBS containing 6% (w/v) IF proteins and no DEX.

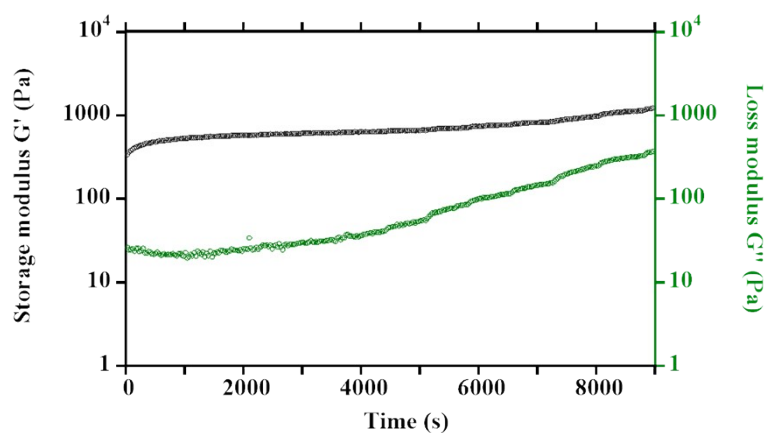

**Figure S6. Time sweep test of storage  $G'$  and loss  $G''$  moduli associated with LSPT.**

The measurement was performed under oscillatory shear at  $\gamma$ , 1%;  $\omega$ , 1 rad/s; and 25 °C with a measurement time of 30–9,000 s. The components were 6% (w/v) hydrogel sample, 10% (w/v) DEX, and 1000 mM NaCl.

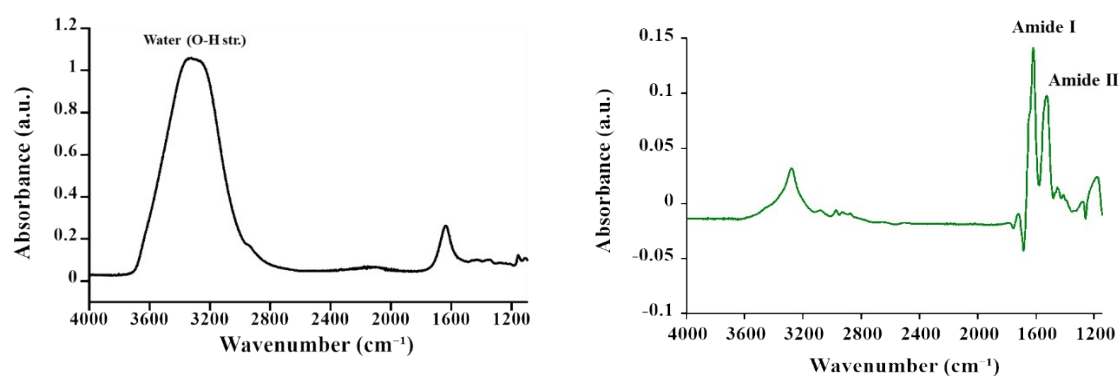

**Figure S7. ATR-FTIR spectra of the background and the full spectrum of Hagfish IF proteins within the hydrogel sample.**

left: Background spectrum of the DEX–PBS solution. right: Full ATR-FTIR spectrum of the Hagfish IF protein within the hydrogel sample.

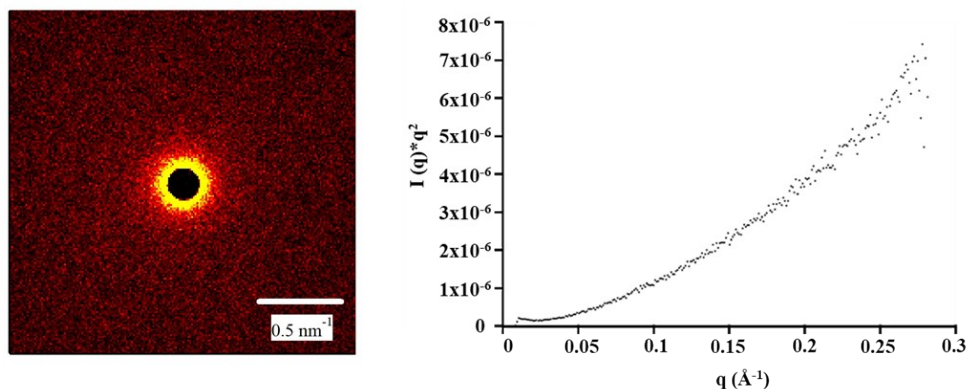

**Figure S8. Small-angle X-ray scattering intensity plot of the internal IF protein-based hydrogel structure.**

Left: Two-dimensional pattern reflecting the structure of IF proteins inside a hydrogel, as obtained via SAXS measurements. The concentrations of system components were 6% (w/v) IF protein, 10% (w/v) DEX, and 1000 mM NaCl. Right: Kratky plot obtained by analyzing the SAXS intensity data. IF, intermediate filament; SAXS, Small angle X-ray scattering; DEX, dextran.
